# Supplementary material for: The Jahn–Teller and pseudo-Jahn–Teller effects in the low-lying electronic states of 1,3,5-trifluorobenzene radical cation
Source: Royal Society of Chemistry journal article supplement (doi:10.1039/b913342a), 2009-01-01
Supplement: b913342a.pdf [file b913342a.pdf]

**Electronic Supplementary information**  
**The Jahn-Teller and pseudo-Jahn-Teller effects in the low-lying  
electronic states of 1,3,5-trifluorobenzene radical cation**

T. Mondal and S. Mahapatra\*

*School of Chemistry, University of Hyderabad, Hyderabad 500046, India*

---

\*Corresponding authors, E-mail: smsc@uohyd.ernet.in, Fax: +91-40-23012460

TABLE I: Normal mode combinations, sizes of the primitive and the single particle basis used in the wave packet propagation within the MCTDH framework in the  $(\tilde{X} - \tilde{A} - \tilde{B} - \tilde{C})$  coupled electronic manifold using the complete vibronic Hamiltonian of Eqs. (2-5e). The CPU time and the required memory of each wave packet calculation are also given.

| Normal modes <sup>a</sup>                               | Primitive basis <sup>b</sup> | SPF basis <sup>c</sup>          | CPU time                       | Required RAM [Mbyte] | Figure |
|---------------------------------------------------------|------------------------------|---------------------------------|--------------------------------|----------------------|--------|
| $(\nu_2, \nu_{11x}, \nu_{11y}, \nu_{19x}, \nu_{19y})$   | (24, 4, 4, 4, 4)             | $[E''_{X,x}, E''_{X,y}, A''_2]$ | $E''_{X,x}$ : 24h 33min 37.83s | 1094.06              | Fig. 6 |
| $(\nu_{9x}, \nu_4, \nu_{14y}, \nu_{20x}, \nu_5)$        | (18, 5, 5, 4, 4)             | $[E'_{B,x}, E'_{B,y}, C'_2]$    | $E'_{X,y}$ : 26h 31min 51.55s  | 1094.06              | Fig. 6 |
| $(\nu_{9y}, \nu_{12x}, \nu_{14x}, \nu_{20y}, \nu_{16})$ | (18, 8, 5, 4, 4)             | [6, 6, 4, 8, 8, 4]              | $A''_2$ : 16h 43min 59.38s     | 1094.06              | Fig. 6 |
| $(\nu_{13x}, \nu_{12y}, \nu_{18x}, \nu_3)$              | (36, 8, 4, 7)                | [6, 6, 5, 7, 7, 4]              | $E'_{B,x}$ : 19h 37min 01.37s  | 1094.06              | Fig. 6 |
| $(\nu_{13y}, \nu_{10x}, \nu_{18y}, \nu_{10y})$          | (36, 5, 4, 5)                | [7, 7, 4, 6, 6, 5]              | $E'_{B,y}$ : 22h 09min 42.13s  | 1094.06              | Fig. 6 |
|                                                         |                              |                                 | $C'_2$ : 22h 08min 00.79s      | 1094.06              |        |

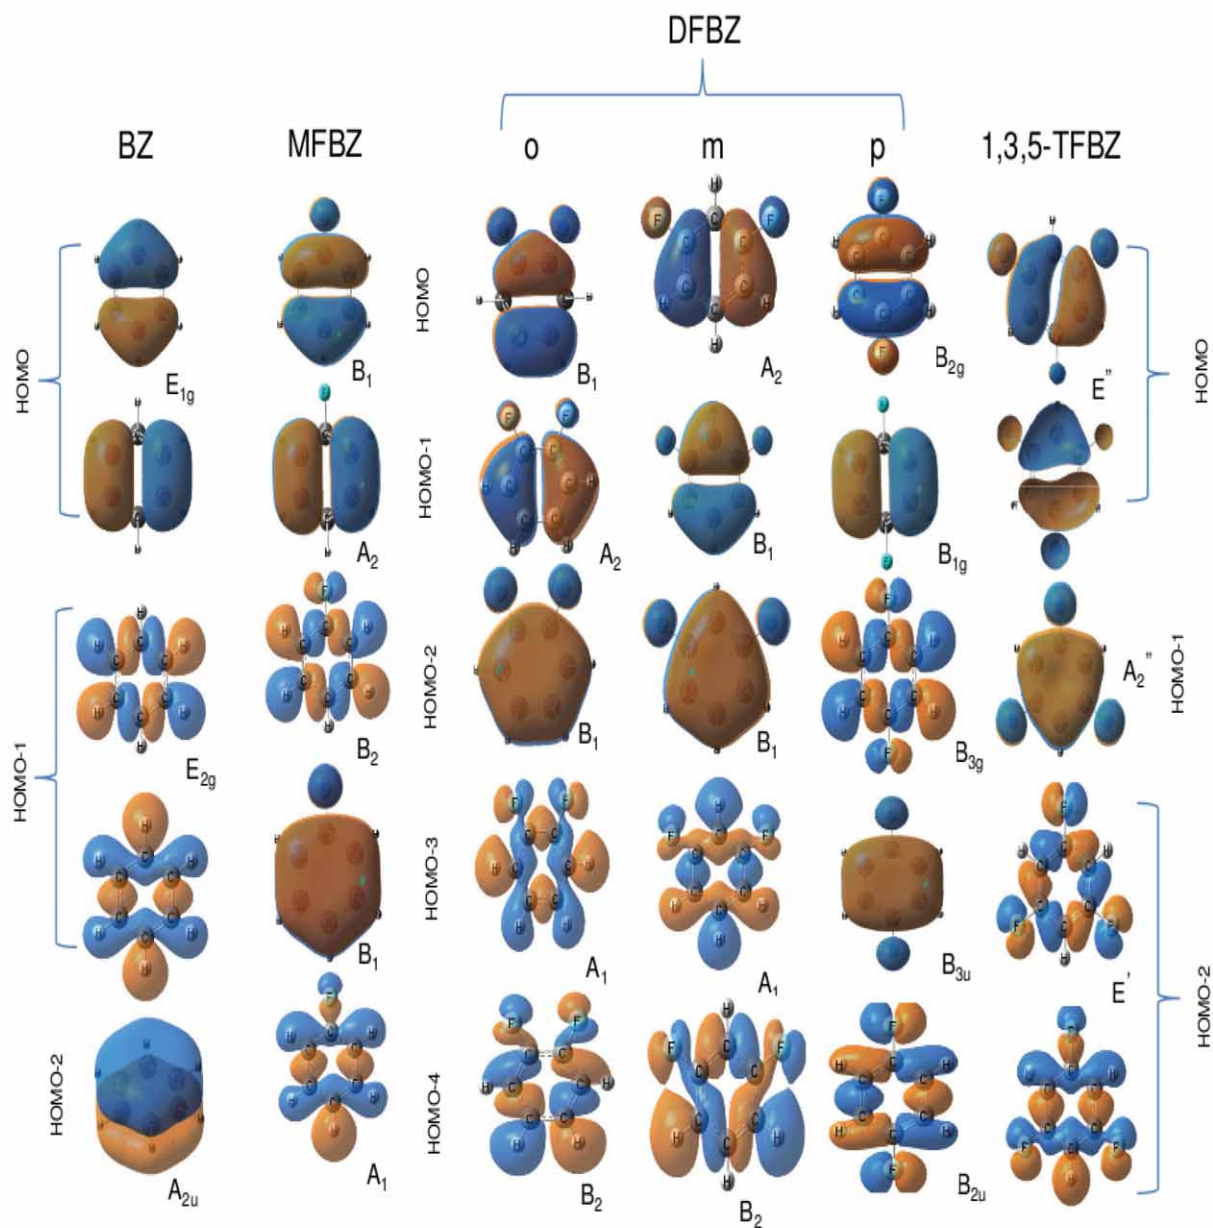

FIG. 1: Schematic plot of the canonical MOs of benzene and its fluoro derivatives. The MOs are calculated at the MP2 level of theory employing cc-pVTZ basis set.
